# Supplementary material for: “Salicylic Acid Mutant Collection” as a Tool to Explore the Role of Salicylic Acid in Regulation of Plant Growth under a Changing Environment
Source: Int J Mol Sci. 2019 Dec 17;20(24):6365. doi: 10.3390/ijms20246365 (PMC6941003; doi:10.3390/ijms20246365)
Supplement: Supplementary file 1 [file ijms-20-06365-s001.pdf]

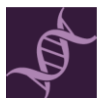

## Supplementary Material

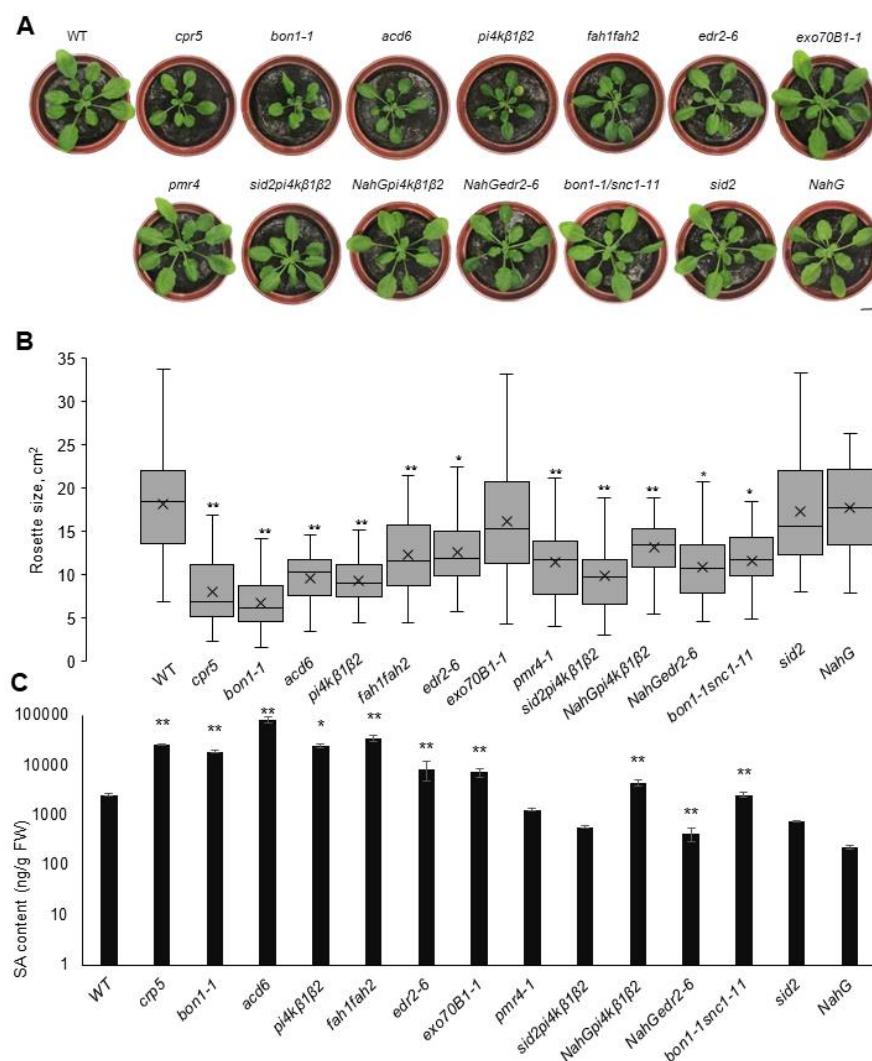

**Supplementary Figure S1.** Rosette size and salicylic acid (SA) content of plants cultivated under short-day conditions. **(A)** Representative images of 4 week old plants cultivated at SD conditions: 22 °C, 10 h light/14 h dark. **(B)** Rosette size. “Immune-related” mutants presented in blue boxes; “phospholipids-related” in red; callose synthase *pmr4* in pink; “reverted” double/triple mutants in yellow and SA-deficient in green. Data are from three biological replicates,  $n \geq 70$ . Central line of the boxplot represents the median occupancy, cross represents the mean, bottom and top edges of the box are 25 and 75% of distribution and the ends of whiskers are set at 1.5 times the interquartile range. Values outside this range are shown as outliers. Data are from three biological replicates,  $n \geq 70$ . **(C)** SA content in the leaves.  $n = 4$ . Asterisks indicate variants that are different from WT, one-way ANOVA with Tukey’s HSD post hoc test, \*  $p < 0.05$ , \*\*  $p < 0.01$ .

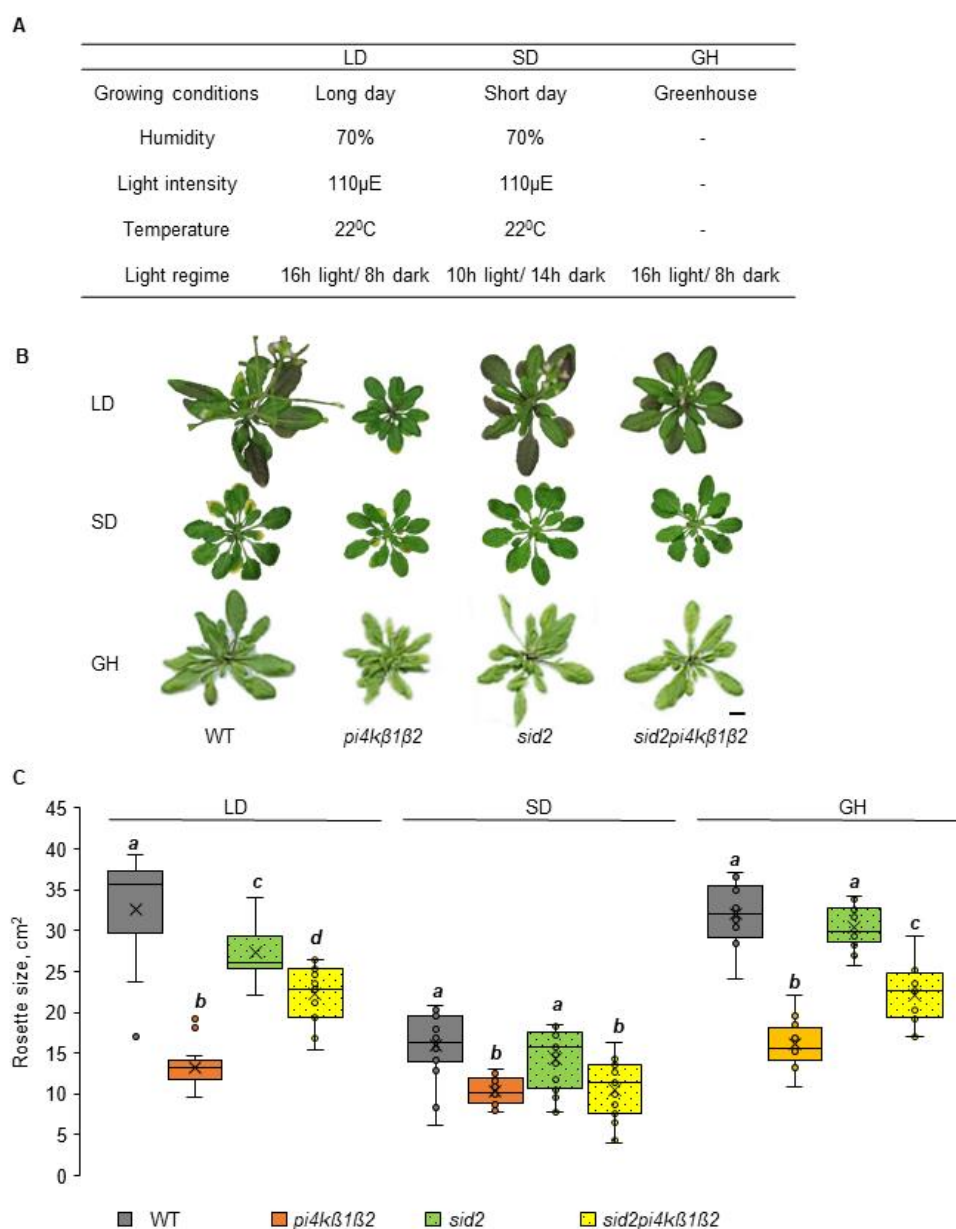

**Supplementary Figure S2.** Effect of cultivation conditions on rosette size of the *pi4k $\beta$ 1 $\beta$ 2* and *sid2pi4k $\beta$ 1 $\beta$ 2* mutants. (A) Conditions of plant cultivation: LD (long day), SD (short day) and GH (greenhouse). (B) Representative images of 5 week old plants cultivated in different setups, bar 1 cm. (C) Rosette size of the studied mutants grown under different conditions. Different letters indicate variants that were significantly different in every growing condition; one-way ANOVA with Tukey's HSD post hoc test,  $p \leq 0.05$ . Data are from three biological replicates,  $n \geq 12$ . Central line of the boxplot represents the median occupancy, cross represents the mean, bottom and top edges of the box are 25% and 75% of distribution and the ends of whiskers are set at 1.5 times the interquartile range.

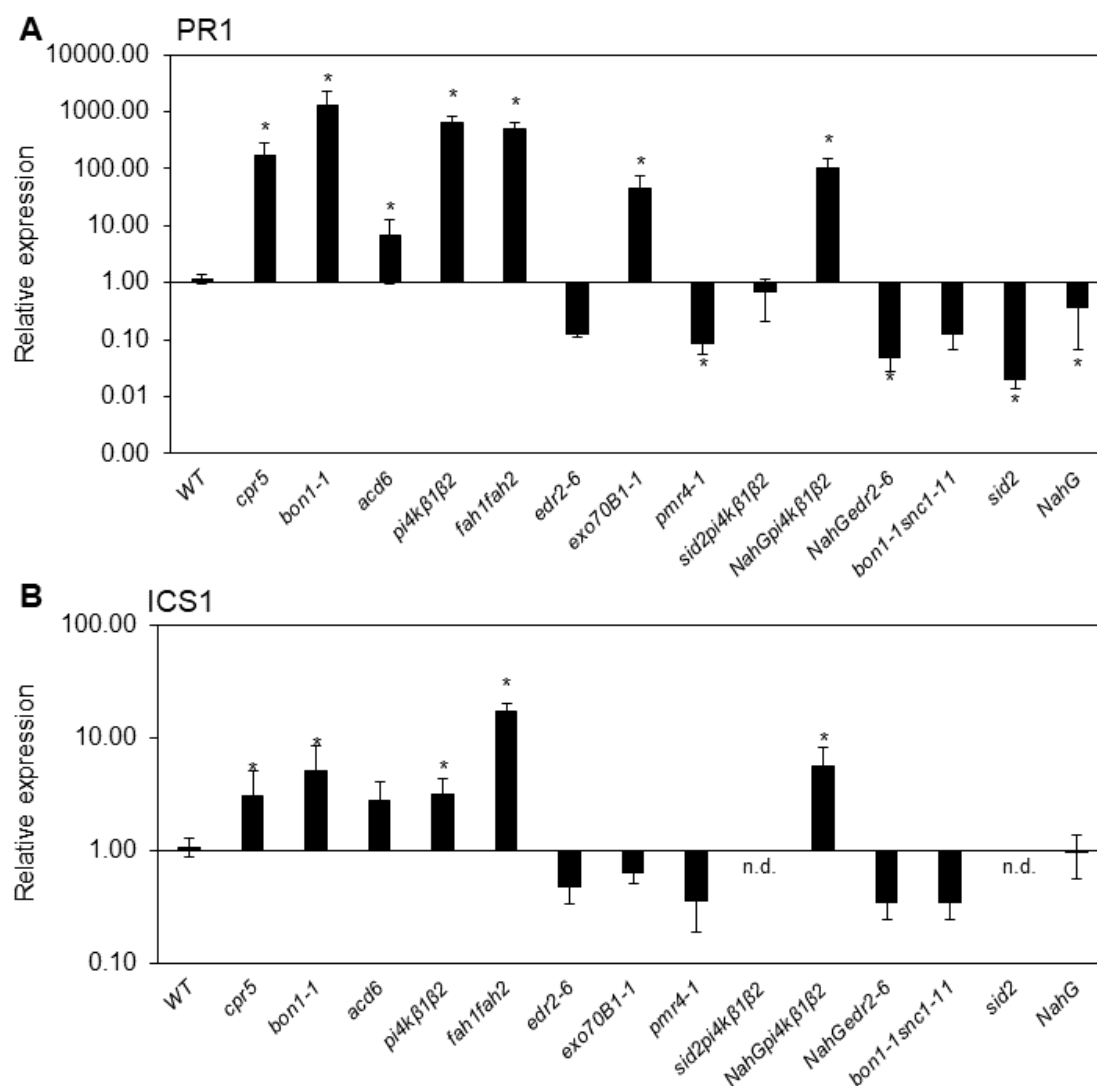

**Supplementary Figure S3.** Transcription of *ICS1* and *PR1* in soil-grown plants cultivated under a short-day light regime. Samples were collected from four 4 week old plants. Values were normalized to WT in the respective conditions. *TIP41* was used as a reference gene. Asterisks indicate values different from WT, *t*-test,  $p < 0.05$ ,  $n = 4$ .

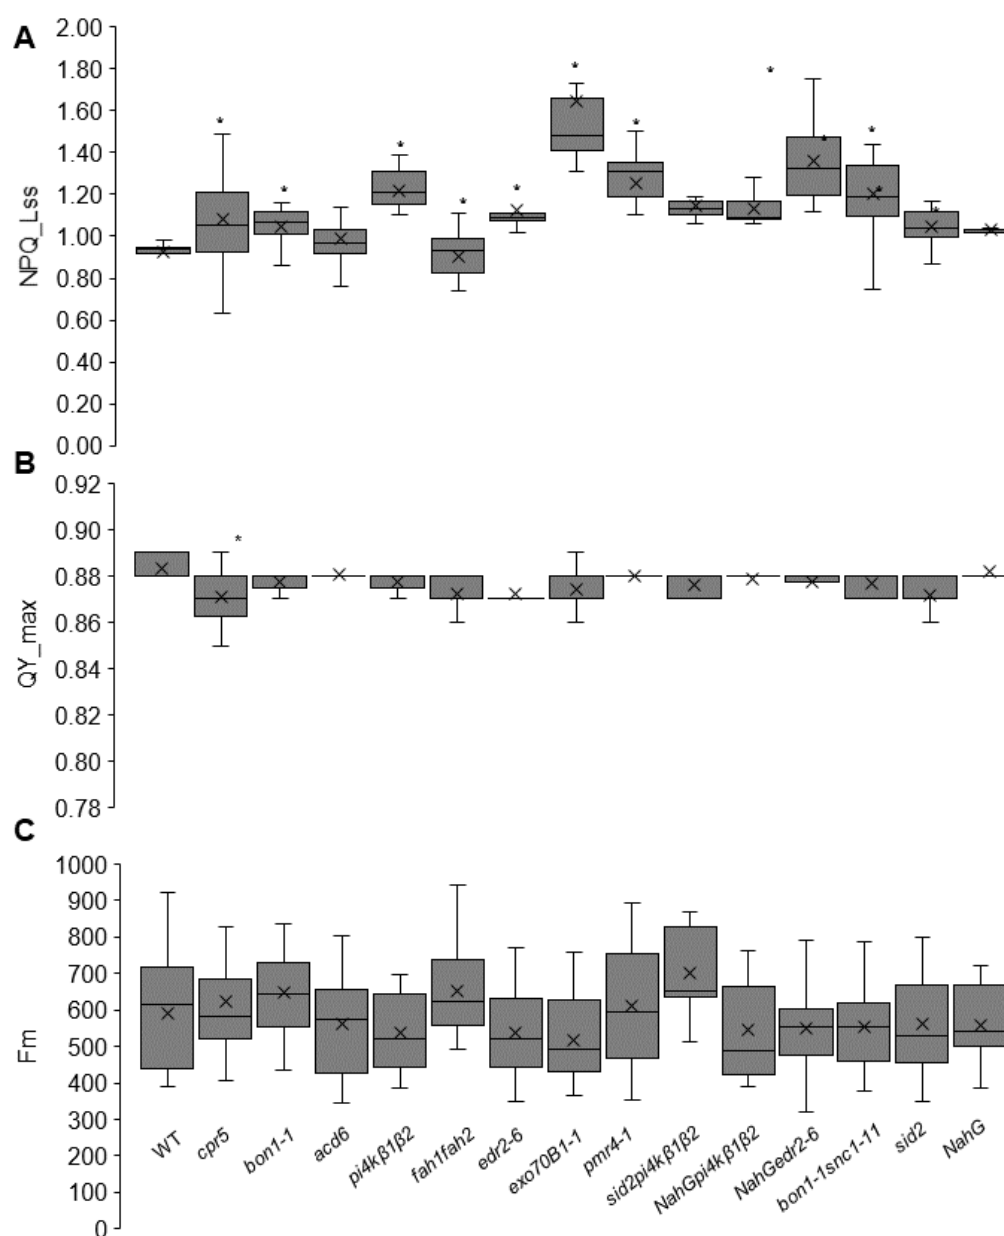

**Supplementary Figure S4.** Photosynthetic parameters of the studied mutants. Four week old plants were cultivated at 22 °C, 10 h light/ 14 h dark. **(A)** NPQ-Lss. **(B)** QY\_max. **(C)** Fm. Central line of the boxplot represents the median occupancy, cross represents the mean, bottom and top edges of the box are 25% and 75% of distribution and the ends of whiskers are set at 1.5 times the interquartile range. Values outside this range are shown as outliers. \* variants that are different from WT, one-way ANOVA with Tukey's HSD post hoc test. Data are from three biological replicates,  $n \geq 70$ .

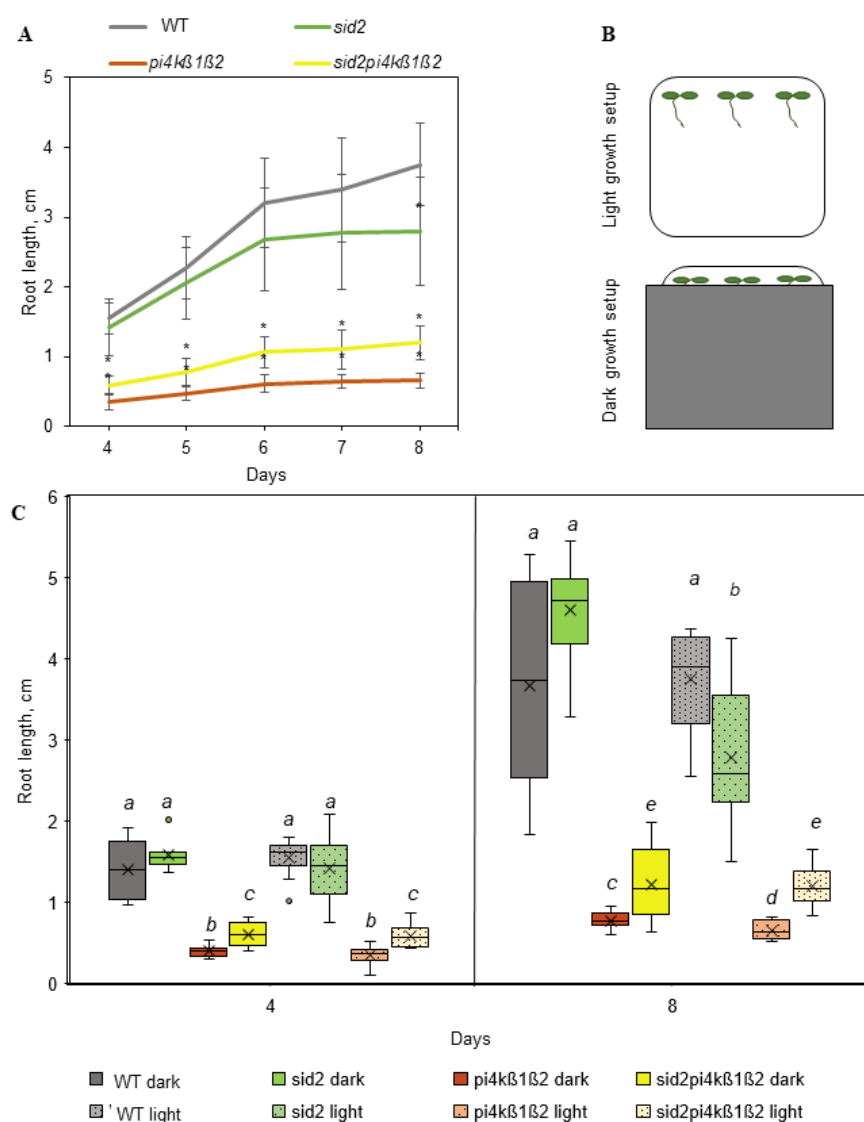

**Supplementary Figure S5.** Effect of light on primary root elongation of the *pi4kβ1β2* and *sid2pi4kβ1β2* mutants grown in vitro under long day conditions. **(A)** Dynamics of primary root growth under long-day conditions. \* variants that are different from WT, one-way ANOVA with Tukey's HSD post hoc test,  $n \geq 10$ . **(B)** Light and dark root setup. **(C)** Length of primary root grown in light or dark root setup at 4 and 8 days. Central line of the boxplot represents the median occupancy, cross represents the mean, bottom and top edges of the box are 25% and 75% of distribution and the ends of whiskers are set at 1.5 times the interquartile range. Differences calculated separately in each group, 4 and 8 days respectively. Letters correspond to significant differences among groups,  $n \geq 10$ .

**Supplemental Table S1.** Primers.

| Gene        | Accession | Forward Primer          | Reverse Primer         |
|-------------|-----------|-------------------------|------------------------|
| <i>TIP4</i> |           |                         |                        |
| 1           | AT4G34270 | GTGAAACTGTTGGAGAGAAGCAA | TCAACTGGATACCCCTTTCGCA |
| <i>PR-1</i> | AT2G14610 | AGTTGTTTGGAGAAAGTCAG    | GTTACATAATTCCCACGA     |
| <i>ICS1</i> | AT1G74710 | GCAAGAATCATGTTCTACC     | AATTATCCTGCTGTTACGAG   |

**Supplemental Table S2.** SA content (ng/g FW) of the soil-grown plants.

| WT                   | Short day |   |          | Long day |   |          |
|----------------------|-----------|---|----------|----------|---|----------|
|                      | 251,380   | ± | 15,930   | 514,591  | ± | 180,327  |
| <i>NahG</i>          | 225,75    | ± | 17,78    | 260,36   | ± | 90,84    |
| <i>sid2</i>          | 741,55    | ± | 24,01    | 215,81   | ± | 50,57    |
| <i>pmr4</i>          | 1275,86   | ± | 50,99    | 994,22   | ± | 107,14   |
| <i>pi4kβ1β2</i>      | 23851,29  | ± | 1950,85  | 9410,93  | ± | 982,55   |
| <i>NahGpi4kβ1β2</i>  | 4458,48   | ± | 659,26   | 455,29   | ± | 130,99   |
| <i>sid2pi4kβ1β2</i>  | 567,54    | ± | 31,92    | 172,26   | ± | 28,88    |
| <i>crp5</i>          | 25511,32  | ± | 800,46   | 29118,68 | ± | 17116,81 |
| <i>bon1-1</i>        | 18437,73  | ± | 964,35   | 32831,49 | ± | 19690,02 |
| <i>bon1-1snc1-11</i> | 2504,99   | ± | 264,97   | 612,13   | ± | 141,04   |
| <i>edr2-6</i>        | 8375,98   | ± | 3633,38  | 2439,16  | ± | 605,55   |
| <i>edr2-6nahG</i>    | 422,06    | ± | 124,73   | 1872,03  | ± | 1091,57  |
| <i>fah1fah2</i>      | 33314,76  | ± | 4732,62  | 64289,30 | ± | 42158,94 |
| <i>exo70B1-1</i>     | 7137,93   | ± | 1340,52  | 1312,63  | ± | 292,41   |
| <i>acd6</i>          | 80154,83  | ± | 10881,94 | 61875,90 | ± | 7018,37  |
